# Supplementary material
Source: MDPI journal article supplement (https://www.mdpi.com/1424-8247/17/3/402)
Supplement: s1 [file s1]

# **Chojaponilactone B attenuates THP-1 macrophage pyroptosis by inhibiting TLR/MyD88/NF- $\kappa$ B pathway**

Qinyin Wen <sup>1</sup>, Bingjinfeng Zhan <sup>1</sup>, Lu Jin <sup>1</sup>, Zijing Peng <sup>1</sup>, Ju Liu <sup>1</sup>, Longping Zhu <sup>1</sup>, Depo Yang <sup>1</sup>, Xinjun Xu <sup>1</sup>, Lixia Zhang <sup>2</sup>, Ge Li <sup>2</sup> and Zhimin, Zhao<sup>1,\*</sup>

<sup>1</sup> School of Pharmaceutical Sciences, Sun Yat-sen University, Guangzhou, Guangdong, China.

<sup>2</sup> Yunnan Key Laboratory of Southern Medicine Utilization, Yunnan Branch Institute of Medicinal Plant Development, Chinese Academy of Medical Sciences, Jinghong, China.

\*Correspondence: Zhimin Zhao: zhaozhm2@mail.sysu.edu.cn; Tel.: +86-020-39943043

| Figure | content                                             | page |
|--------|-----------------------------------------------------|------|
| S1     | Isolation and purification of Chlojaponilactone B   | 3    |
| S2     | <sup>1</sup> H NMR spectrum of Chlojaponilactone B  | 4    |
| S3     | <sup>13</sup> C NMR spectrum of Chlojaponilactone B | 5    |

## S1. Isolation and purification of Chlojaponilactone B

The whole plants of *Chloranthus japonicus* were collected in March 2018 at Xishuangbanna, Yunnan Province, China, and authenticated by one of the co-authors (Depo, Yang). A voucher specimen (accession number: CJB201806) has been deposited at the School of Pharmaceutical Sciences, Sun Yat-sen University. Whole *Chloranthus japonicus* plants (20 kg) were air-dried, powdered, and extracted using 95% EtOH ( $3 \times 75$  L) for 1 week each at room temperature. The 95% EtOH extract was evaporated by removing the solvents to obtain the crude extract (1.5 kg), which was suspended in H<sub>2</sub>O (5 L). The crude extract was partitioned into petroleum ether ( $3 \times 5$  L), EtOAc ( $3 \times 5$  L), and *n*-BuOH ( $3 \times 5$  L) fractions. The EtOAc extract (485.00 g) was purified by MCI gel column chromatography (CC) by gradient elution with an MeOH/H<sub>2</sub>O gradient (30:70 to 100:0) to obtain five fractions (I-V). Fraction III (52.06 g) was chromatographed over a C18 reversed-phase (RP-18) silica gel by gradient elution with petroleum ether/EtOAc (100:0 to 75:25) to obtain six fractions (IIIa-III<sub>f</sub>). Fraction III<sub>c</sub> (1.95 g) was purified on a Sephadex LH-20 CC column using isocratic elution with CH<sub>2</sub>Cl<sub>2</sub>/MeOH (0:100) to afford three fractions (IVa-IV<sub>c</sub>). Finally, Fraction IV<sub>b</sub> (700 mg) was purified by HPLC with MeOH/H<sub>2</sub>O (70:30) to yield Chlojaponilactone B (300 mg).

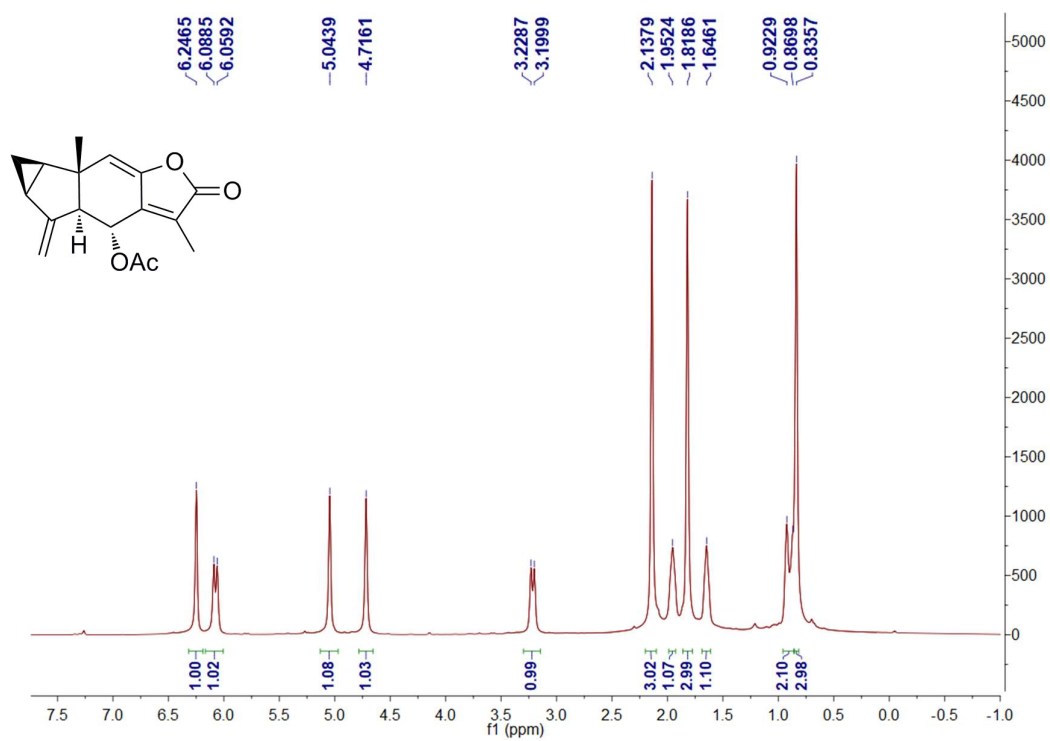

S2. <sup>1</sup>H NMR spectrum of Chlojaponilactone B (CDCl<sub>3</sub>, 400 MHz)

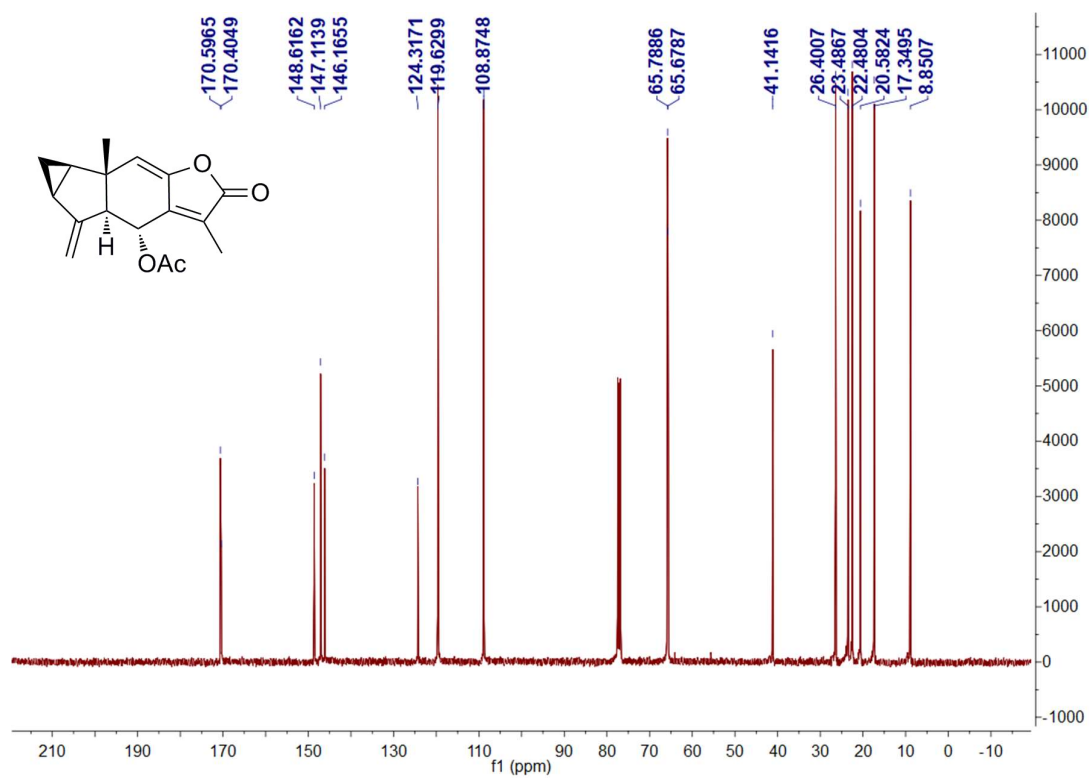

**S3.**  $^{13}\text{C}$  NMR spectrum of Chlojaponilactone B ( $\text{CDCl}_3$ , 100 MHz)
